# Supplementary material
Source: publisher figshare collection journal article supplement (https://sage.figshare.com/ndownloader/files/16249487)
Supplement: Supplementary file 1 [file 16249487]

# Supplementary Information

## **Cicadamides A and B, *N*-acetyldopamine dimers from the insect *Periostracum cicadae***

Huan Liu<sup>a,b,†</sup>, Yong-Ming Yan<sup>b,†</sup>, Li Liao<sup>a,b</sup>, Shao-Xiang Wang<sup>b</sup>, Yi Zhang<sup>a,\*</sup> and Yong-Xian Cheng<sup>b,\*</sup>

<sup>a</sup>*College of Ethnic Medicine, College of Pharmacy, Chengdu University of Traditional Chinese Medicine, Chengdu, 611137, PR China*

<sup>b</sup>*School of Pharmaceutical Sciences, Shenzhen University Health Science Center, Shenzhen 518060, PR China*

<sup>†</sup>These authors contributed equally to this work.

\*Corresponding authors. E-mail: [zhangyi@cdutcm.edu.cn](mailto:zhangyi@cdutcm.edu.cn), [yxcheng@szu.edu.cn](mailto:yxcheng@szu.edu.cn)

## Content

Figure S1.  $^1\text{H}$  NMR spectrum of **1** in methanol- $d_4$

Figure S2.  $^{13}\text{C}$  NMR and DEPT spectra of **1** in methanol- $d_4$

Figure S3.  $^1\text{H}$ - $^1\text{H}$  COSY spectrum of **1** in methanol- $d_4$

Figure S4. HSQC spectrum of **1** in methanol- $d_4$

Figure S5. HMBC spectrum of **1** in methanol- $d_4$

Figure S6. ROESY spectrum of **1** in methanol- $d_4$

Figure S7. HRESIMS of **1**

Figure S8.  $^1\text{H}$  NMR spectrum of **2** in methanol- $d_4$

Figure S9.  $^{13}\text{C}$  NMR and DEPT spectra of **2** in methanol- $d_4$

Figure S10.  $^1\text{H}$ - $^1\text{H}$  COSY spectrum of **2** in methanol- $d_4$

Figure S11. HSQC spectrum of **2** in methanol- $d_4$

Figure S12. HMBC spectrum of **2** in methanol- $d_4$

Figure S13. HRESIMS of **2**

Figure S14.  $^1\text{H}$  NMR spectrum of **5** in methanol- $d_4$

Figure S15.  $^{13}\text{C}$  NMR and DEPT spectra of **5** in methanol- $d_4$

Figure S16. HSQC spectrum of **5** in methanol- $d_4$

Figure S17. HMBC spectrum of **5** in methanol- $d_4$

ECD calculated methods

Cell viability assay against cancer cells



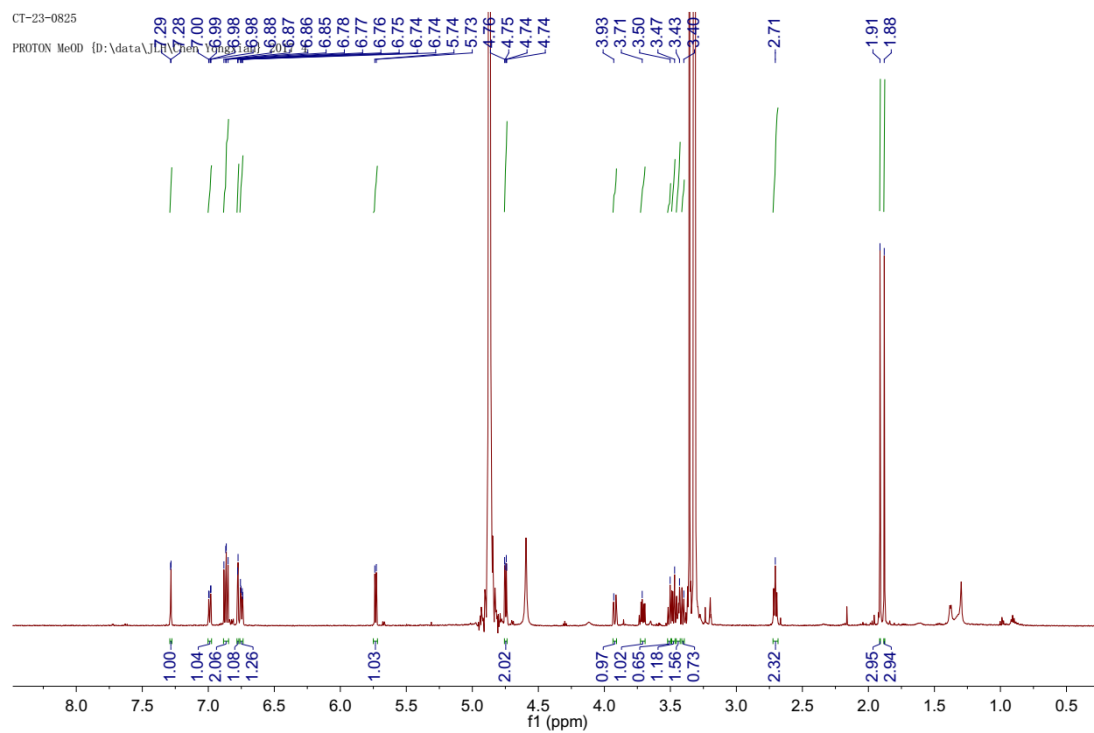

Figure S1.  $^1\text{H}$  NMR spectrum of **1** in methanol- $d_4$

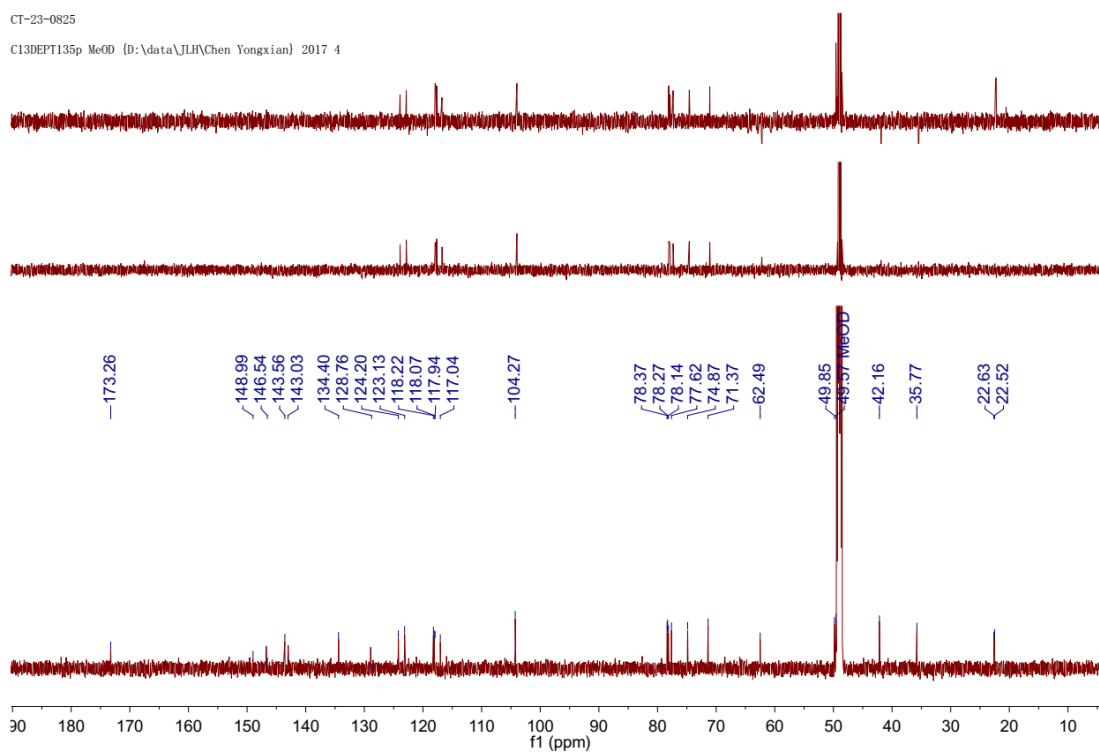

Figure S2.  $^{13}\text{C}$  NMR and DEPT spectra of **1** in methanol- $d_4$

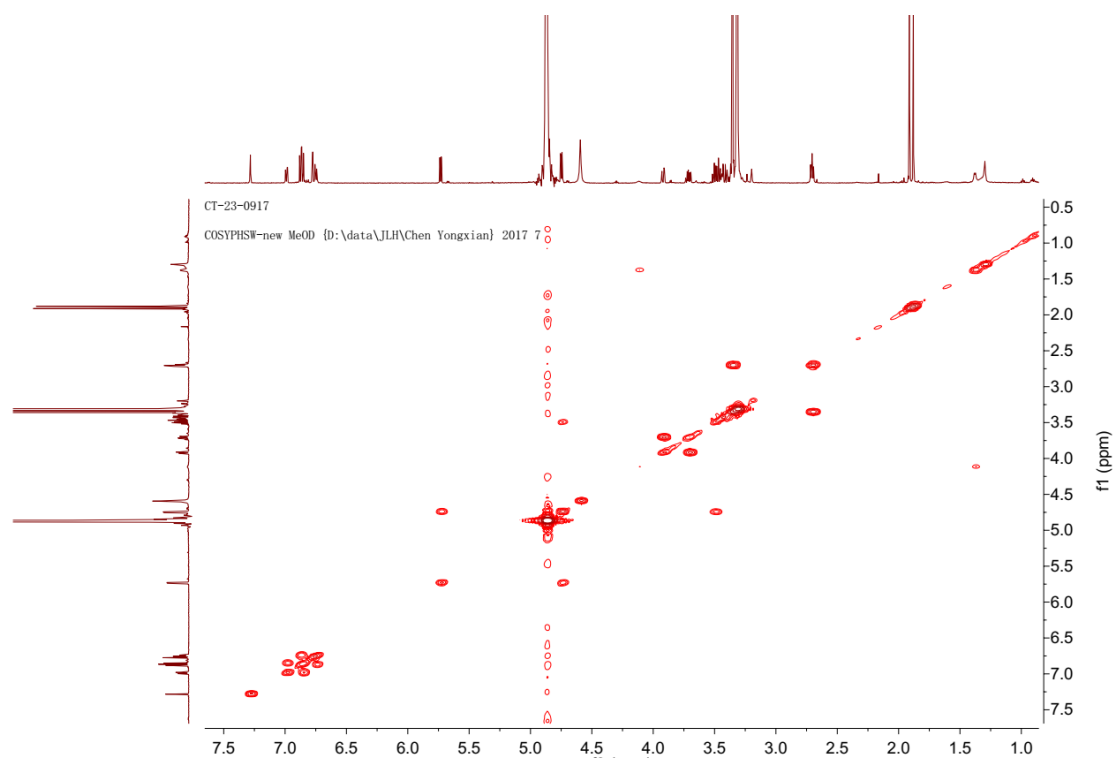

Figure S3.  $^1\text{H}$ - $^1\text{H}$  COSY spectrum of **1** in methanol- $d_4$

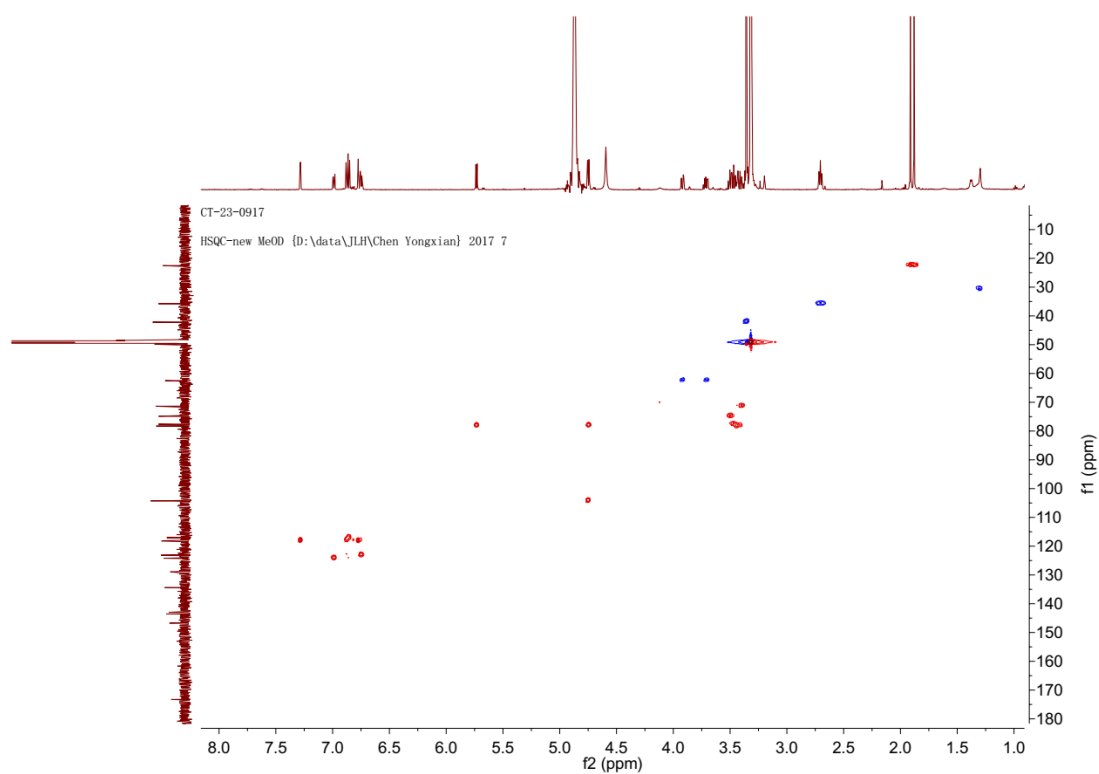

Figure S4. HSQC spectrum of **1** in methanol-*d*<sub>4</sub>

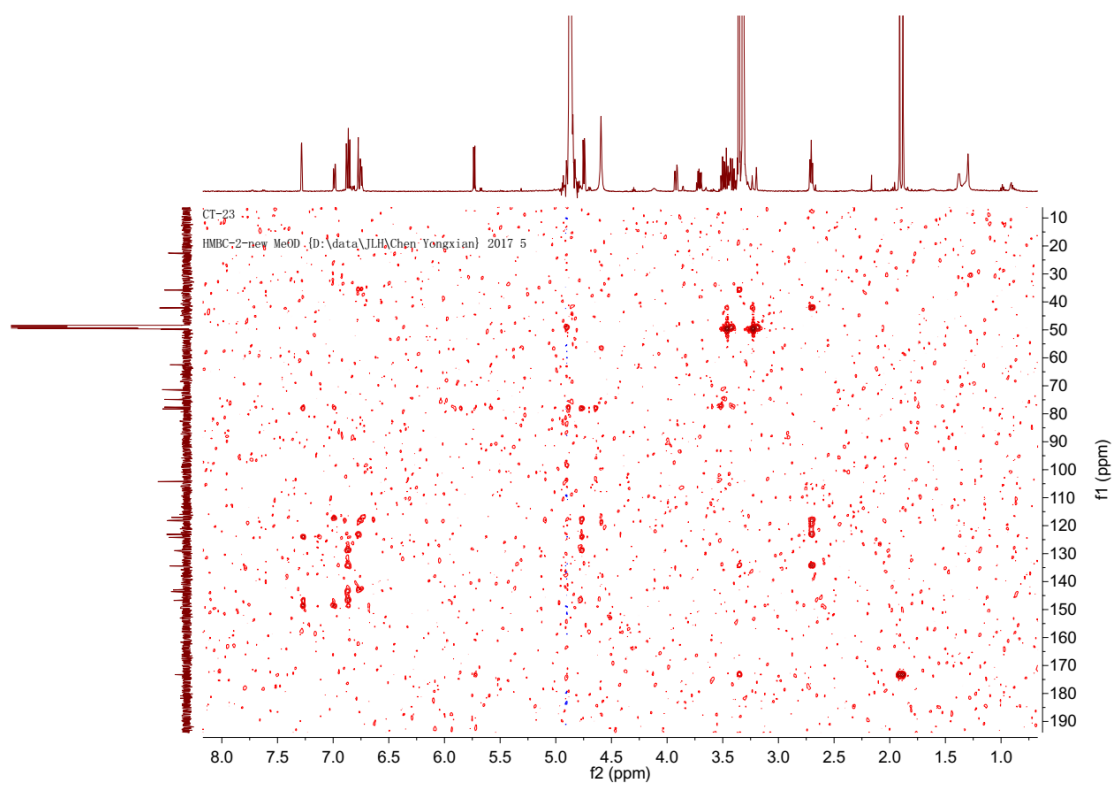

Figure S5. HMBC spectrum of **1** in methanol-*d*<sub>4</sub>

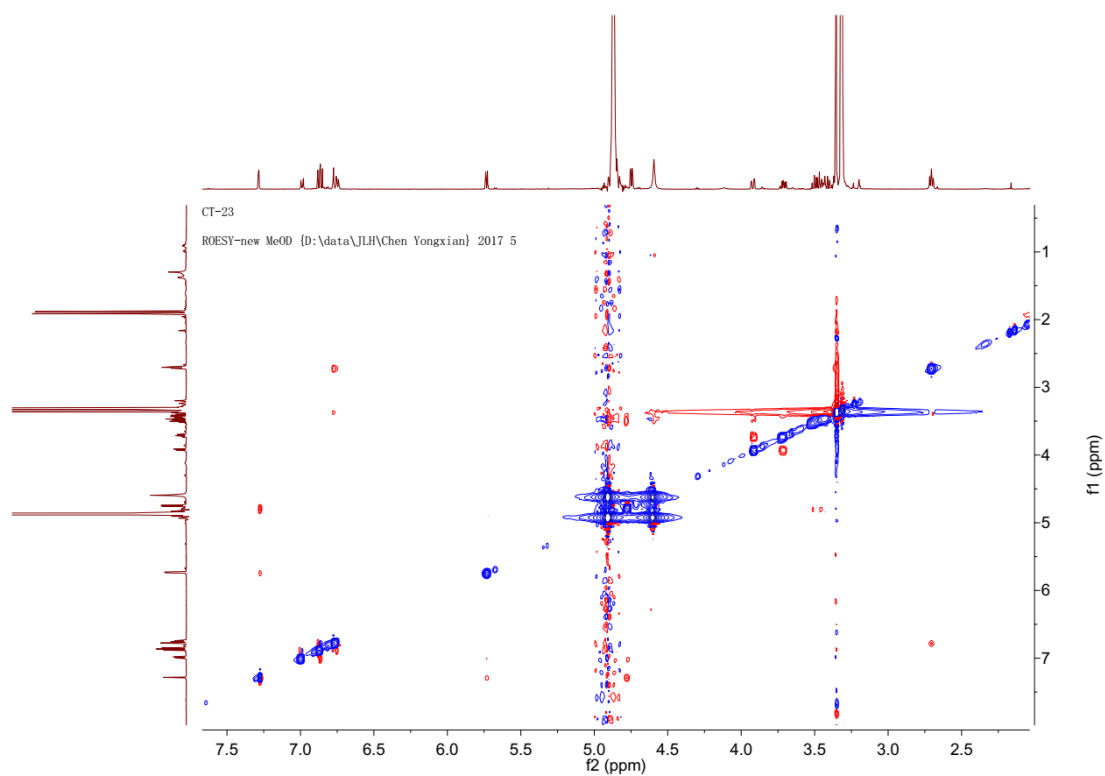

Figure S6. ROESY spectrum of **1** in methanol-*d*<sub>4</sub>

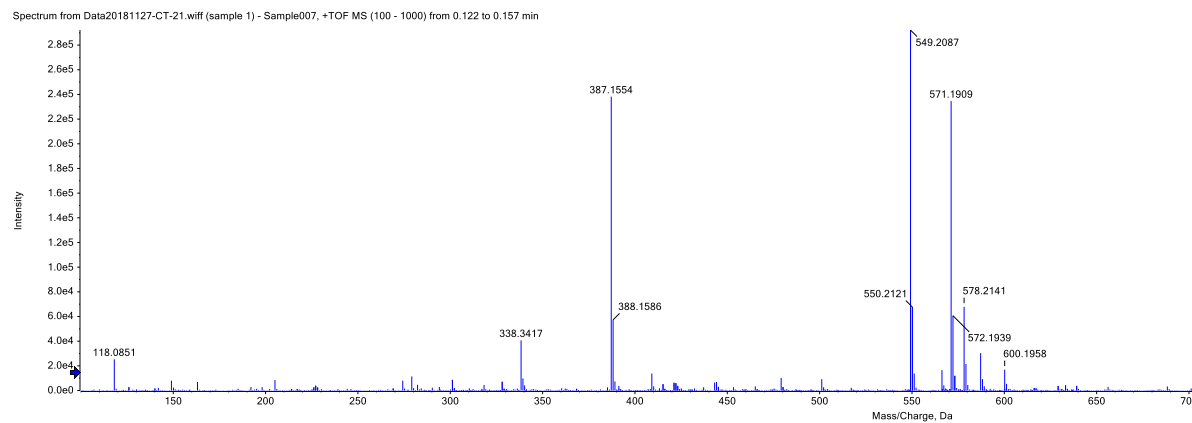

[M+H]<sup>+</sup> m/z 549.2087

| Hit | Formula                                                        | m/z      | RDB  | ppm |
|-----|----------------------------------------------------------------|----------|------|-----|
| 1   | C <sub>26</sub> H <sub>32</sub> N <sub>2</sub> O <sub>11</sub> | 549.2079 | 12.0 | 1.5 |

Elments from ~ to C<sub>60</sub>H<sub>120</sub>O<sub>60</sub>N<sub>2</sub>

Mass tolerance 5 ppm

Figure S7. HRESIMS of **1**





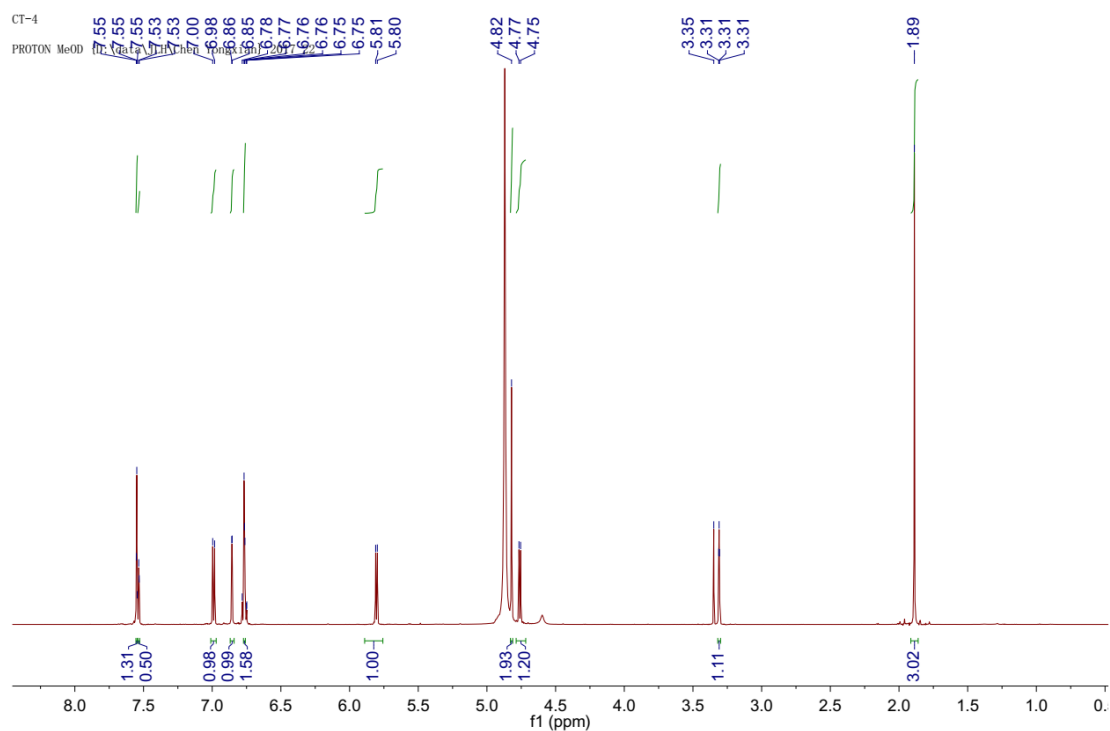

Figure S8.  $^1\text{H}$  NMR spectrum of **2** in methanol- $d_4$

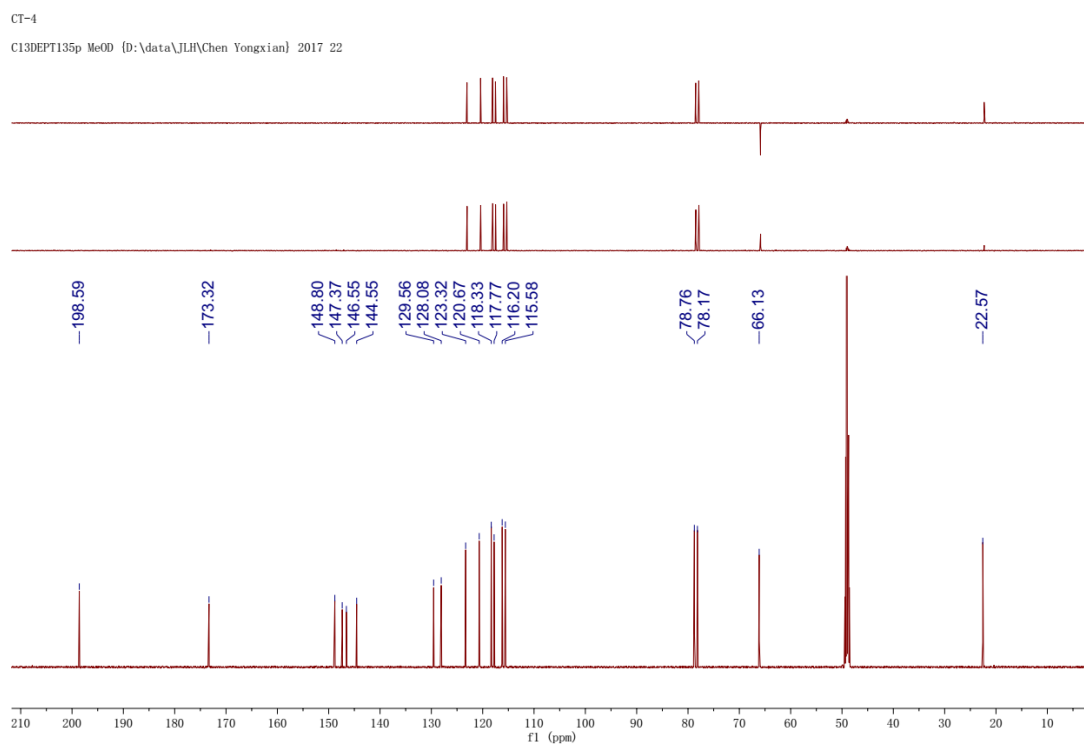

Figure S9.  $^{13}\text{C}$  NMR and DEPT spectra of **2** in methanol- $d_4$

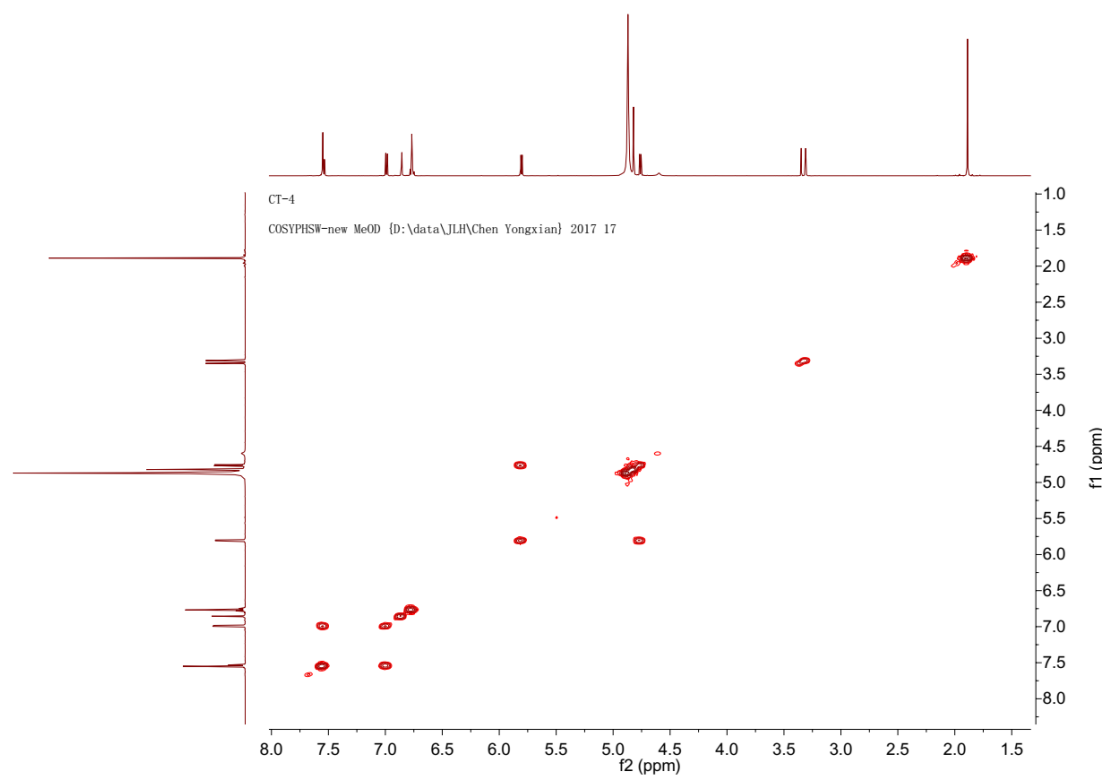

Figure S10.  $^1\text{H}$ - $^1\text{H}$  COSY spectrum of **2** in methanol- $d_4$

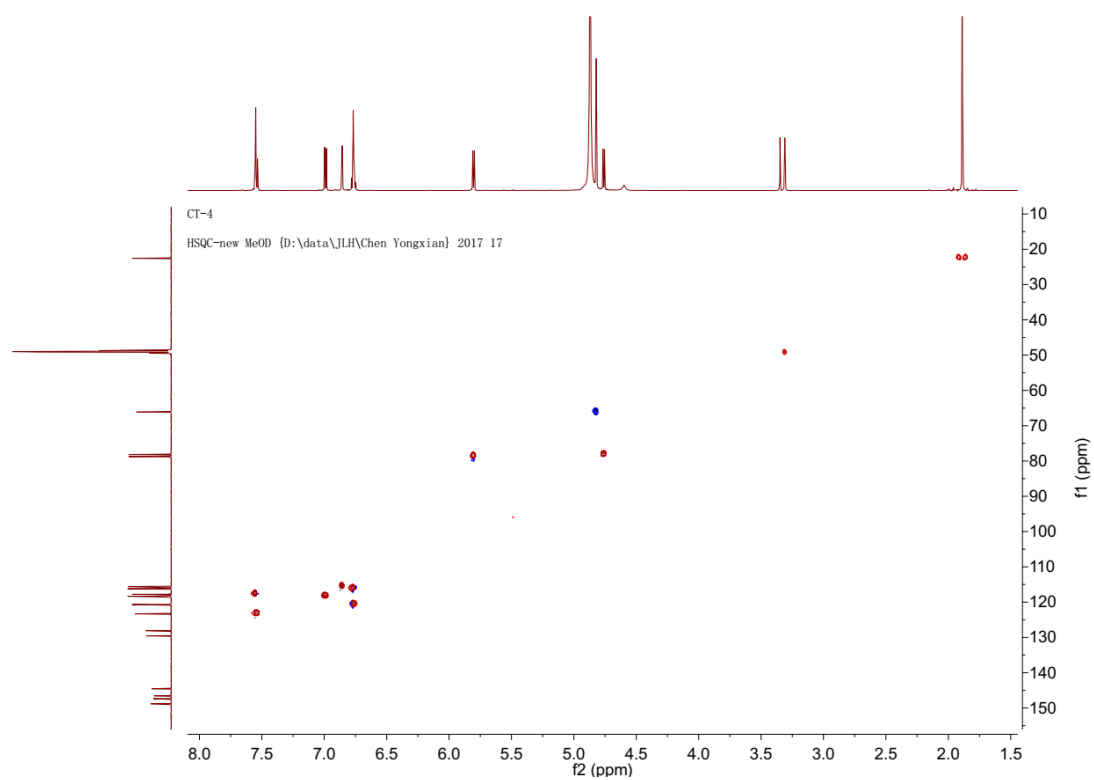

Figure S11. HSQC spectrum of **2** in methanol-*d*<sub>4</sub>

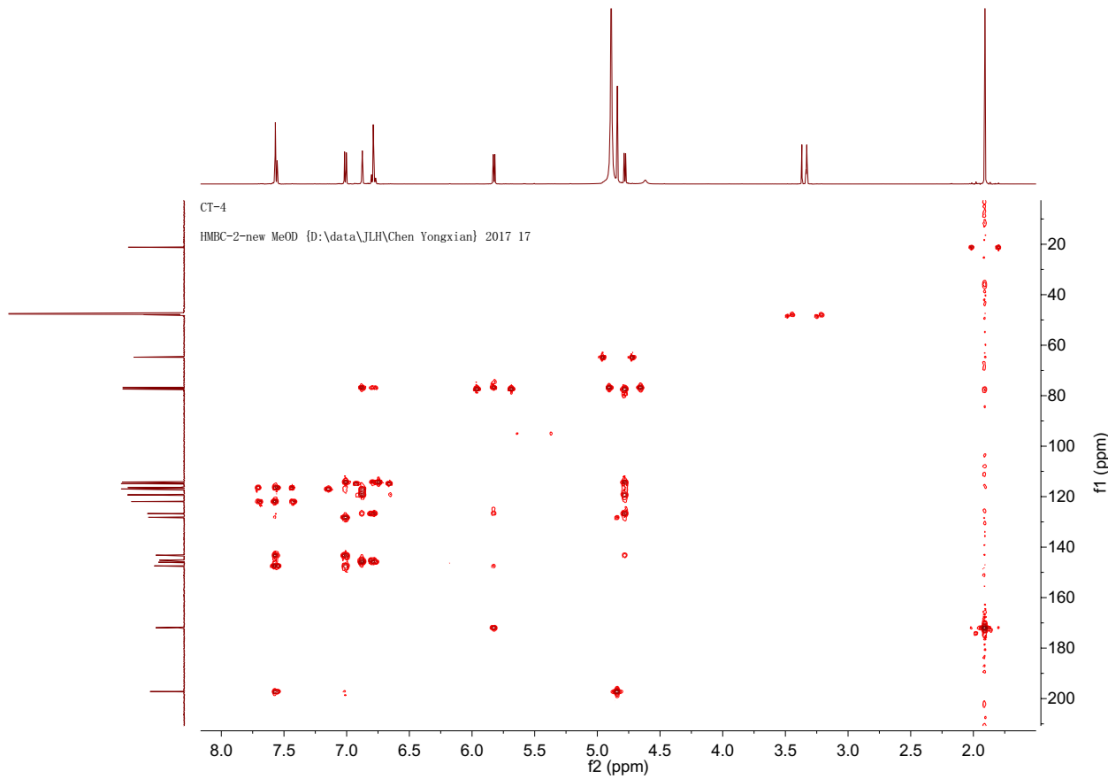

Figure S12. HMBC spectrum of **2** in methanol-*d*<sub>4</sub>

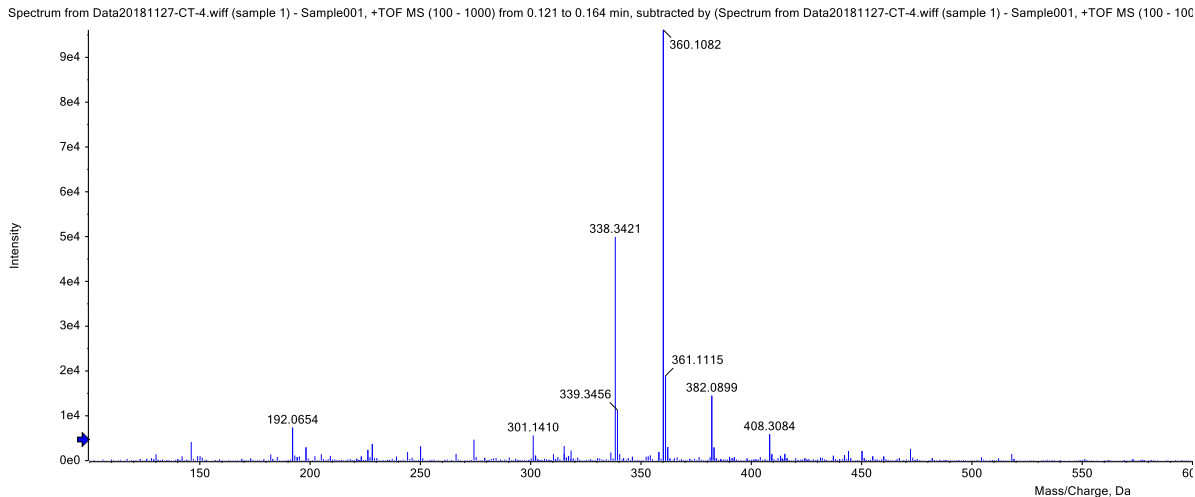

[M+H]<sup>+</sup> m/z 360.1082

| Hit | Formula                                         | m/z      | RDB  | ppm |
|-----|-------------------------------------------------|----------|------|-----|
| 1   | C <sub>18</sub> H <sub>17</sub> NO <sub>7</sub> | 360.1078 | 11.0 | 1.2 |

Elements from ~ to C<sub>60</sub>H<sub>120</sub>O<sub>60</sub>N

Mass tolerance 5 ppm

Figure S13. HRESIMS of **2**

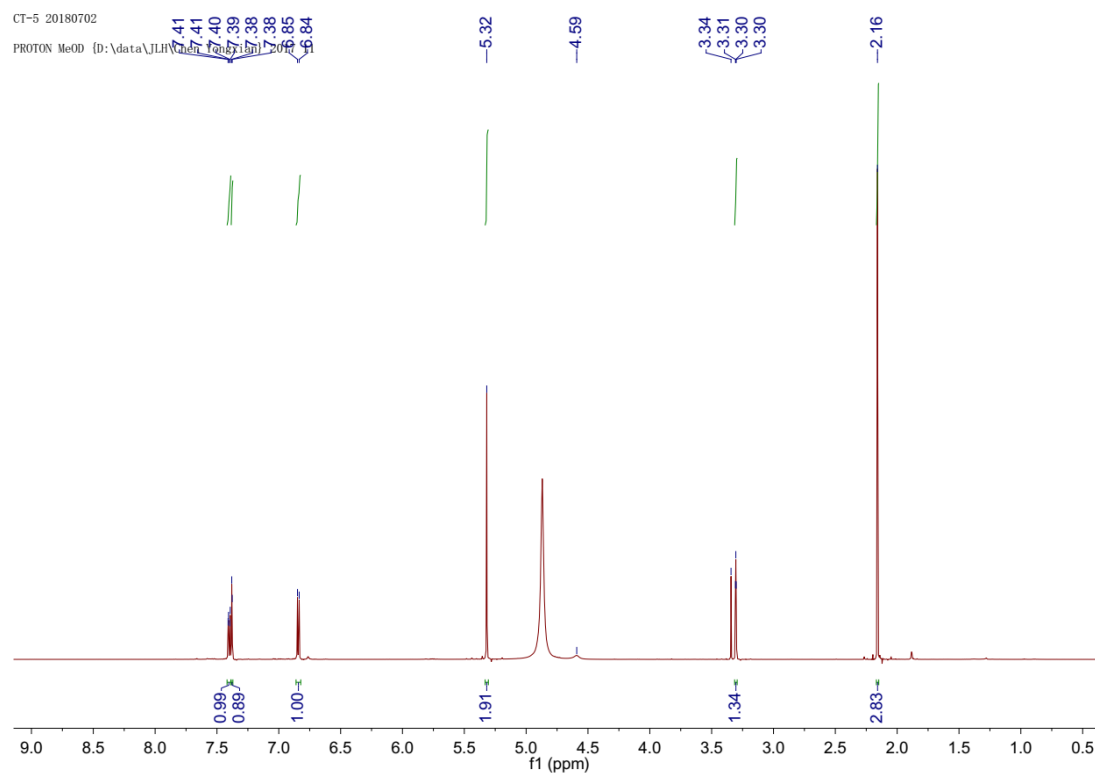

Figure S14. <sup>1</sup>H NMR spectrum of **6** in methanol-*d*<sub>4</sub>

CT-5 20180702

C13DEPT135p MeOD {D:\data\JLH\Chen Yongxian} 2017 11

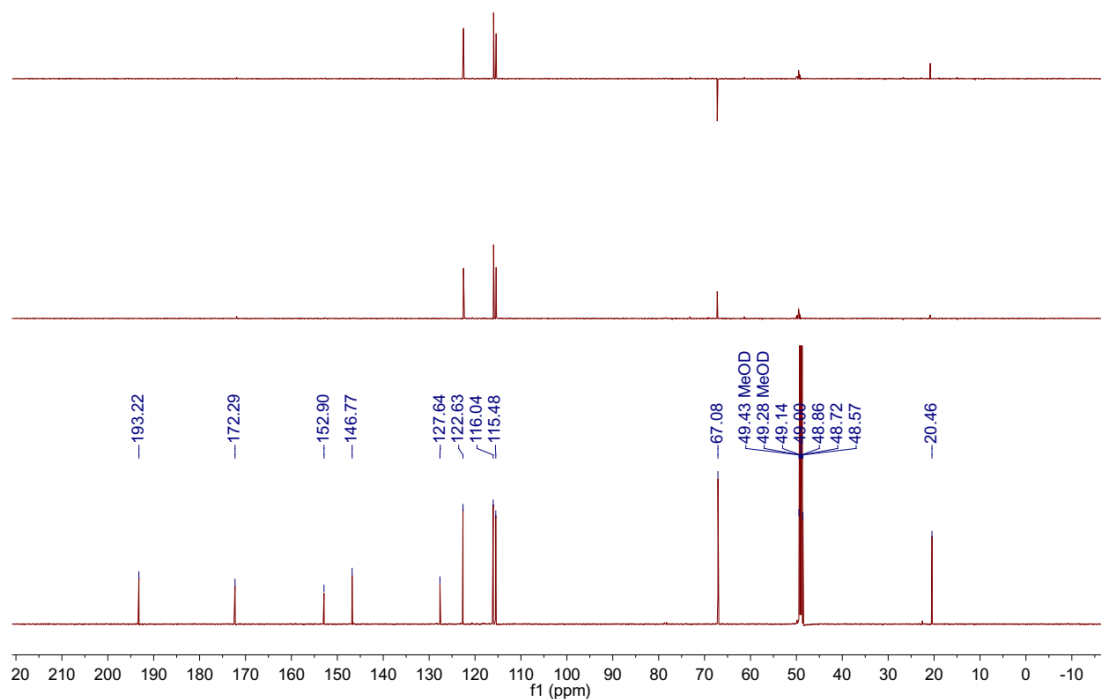

Figure S15.  $^{13}\text{C}$  NMR and DEPT spectra of **5** in methanol- $d_4$

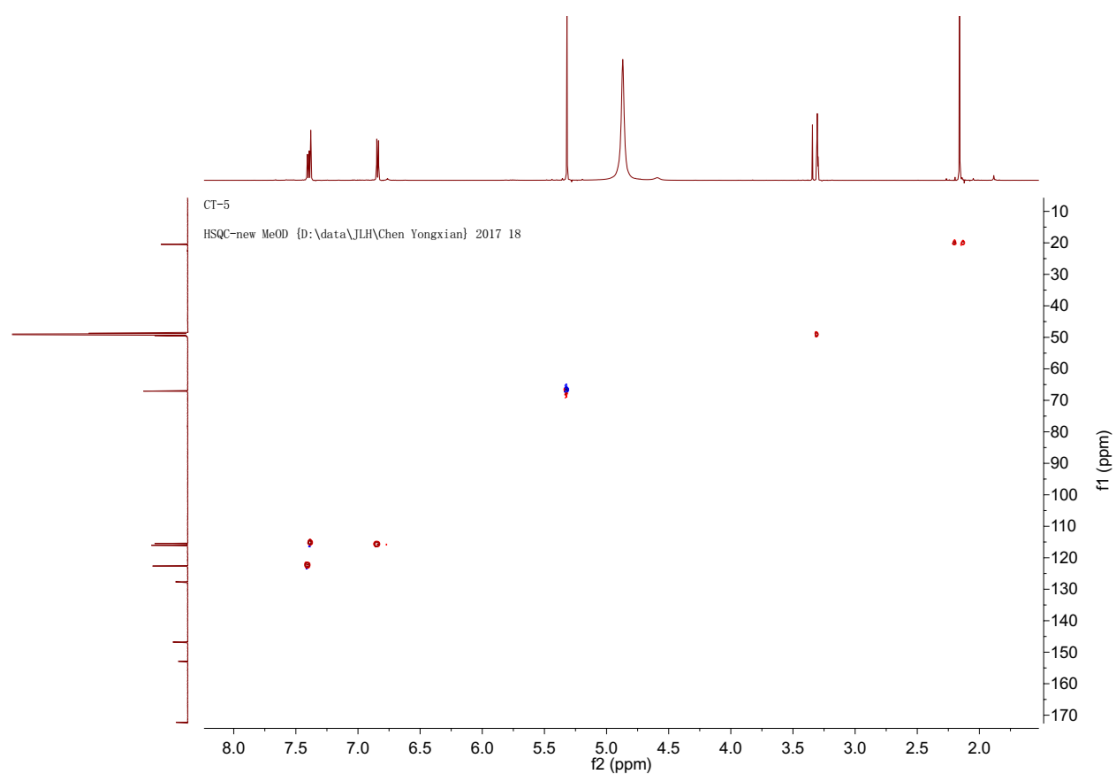

Figure S16. HSQC spectrum of **5** in methanol- $d_4$

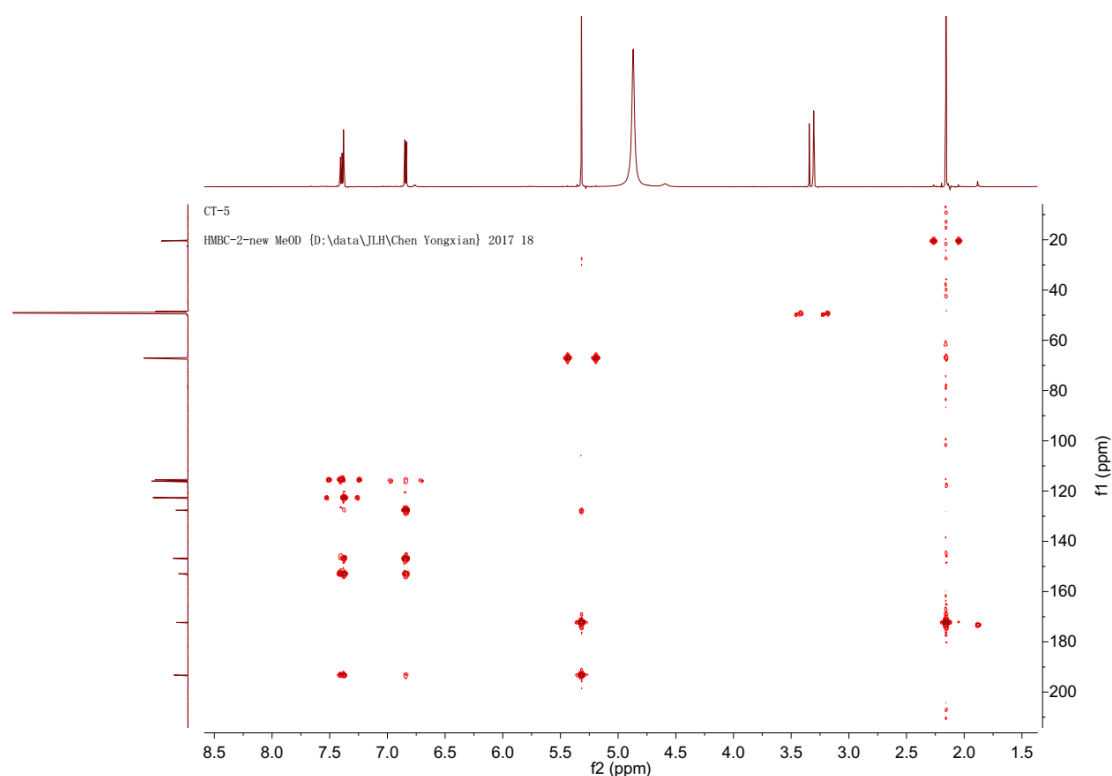

Figure S17. HMBC spectrum of **5** in methanol-*d*<sub>4</sub>

### ECD calculated methods

Molecular Merck force field (MMFF) and DFT/TDDFT calculations were performed with Spartan'14 software package (Wavefunction Inc., Irvine, CA, USA) and Gaussian09 program package (Frisch et al. 2010), Conflex conformational search generated low-energy conformers within a 10 kcal/mol energy was finished by software CONFLEX 7. The predominant conformers were optimized by DFT calculation at B3LYP/6-31G (d,p) level with the PCM in MeOH. ECD calculations further were conducted at the B3LYP/6-31G (d,p) level with the PCM in MeOH. For comparisons of the calculated curves and experimental CD spectra, the program SpecDis (Bruhn et al. 2013) was used.

### References

- (1) Frisch, M. J.; Trucks, G. W.; Schlegel, H. B.; Scuseria, G. E.; Robb, M. A.;

Cheeseman, J. R.; Scalmani, G.; Barone, V.; Mennucci, B.; Petersson, G. A.; Nakatsuji, H.; Caricato, M.; Li, X.; Hratchian, H. P.; Izmaylov, A. F.; Bloino, J.; Zheng, G.; Sonnenberg, J. L.; Hada, M.; Ehara, M.; Toyota, K.; Fukuda, R.; Hasegawa, J.; Ishida, M.; Nakajima, T.; Honda, Y.; Kitao, O.; Nakai, H.; Vreven, T.; Montgomery, J. A.; Peralta, J. E.; Ogliaro, F.; Bearpark, M.; Heyd, J. J.; Brothers, E.; Kudin, K. N.; Staroverov, V. N.; Keith, T.; Kobayashi, R.; Normand, J.; Raghavachari, K.; Rendell, A.; Burant, J. C.; Iyengar, S. S.; Tomasi, J.; Cossi, M.; Rega, N.; Millam, J. M.; Klene, M.; Knox, J. E.; Cross, J. B.; Bakken, V.; Adamo, C.; Jaramillo, J.; Gomperts, R.; Stratmann, R. E.; Yazyev, O.; Austin, A. J.; Cammi, R.; Pomelli, C.; Ochterski, J. W.; Martin, R. L.; Morokuma, K.; Zakrzewski, V. G.; Voth, G. A.; Salvador, P.; Dannenberg, J. J.; Dapprich, S.; Daniels, A. D.; Farkas, O.; Foresman, J. B.; Ortiz, J. V.; Cioslowski, J.; Fox, D. J. Gaussian 09, revision C.01. Gaussian, Inc.: Wallingford CT, 2010.

(2) Bruhn, T.; Schaumlöffel, A.; Hemberger, Y.; Bringmann, G. *Chirality* 2013, 25, 243–249.

### **Cell viability assay against cancer cells**

Human cancer cell lines were obtained from the Cell Bank of China Science Academy (Shanghai, PR China), maintained in Dulbecco's modified Eagle's medium (DMEM) supplemented with 10% fetal bovine serum and 100 U/mL penicillin-streptomycin and incubated at 37 °C in an atmosphere of 5% CO<sub>2</sub>. Cell viability was evaluated using the CCK-8 assay (Dojindo Laboratories, Tokyo, Japan) according to the manufacturer's instructions. Exponentially growing cells were seeded at 3–8×10<sup>3</sup> cells per well in 96-well culture plates for 24 h. Cells were exposed to increasing concentrations (0–80 μM) of compounds **1**, (+)-**2**, and (–)-**2** or 5-FU for 48 h. The equal volume of DMSO was used as the solvent control. CCK-8 solution (10 μL) was added to each well and incubated for another 1–4 h. Light absorbance of the solution was measured at 450 nm (Epoch 2; BioTek Instruments, Inc., Winooski, VT, USA). The IC<sub>50</sub> values were

calculated using the PrismPad program (Version 5.0, GraphPad Software, San Diego, CA, USA).
